# Supplementary material for: Significant and Systematic Expression Differentiation in Long-Lived Yeast Strains
Source: PLoS One. 2007 Oct 31;2(10):e1095. doi: 10.1371/journal.pone.0001095 (PMC2039703; doi:10.1371/journal.pone.0001095)
Supplement: Text S1 — Spreadsheet of KEGG analysis (0.05 MB XLS) [file pone.0001095.s004.xls]

## Sheet: sub
		Gene_Num	sch9_wt.greater.pval	sch9_wt.greater.qval	ras2_wt.greater.pval	ras2_wt.greater.qval	tor1_wt.greater.pval	tor1_wt.greater.qval	sch9_wt.less.pval	sch9_wt.less.qval	ras2_wt.less.pval	ras2_wt.less.qval	tor1_wt.less.pval	tor1_wt.less.qval
sce00010	Glycolysis / Gluconeogenesis	32	0.0447664	0.479438	7.54329e-06	0.000494946	0.0021406	0.0702267	0.955286	0.846818	0.999992	0.846818	0.997863	0.846818
sce00020	Citrate cycle (TCA cycle)	30	0.999865	0.955544	0.831084	0.955544	0.9963	0.955544	0.000135129	0.00273319	0.169062	0.468798	0.00370614	0.0396345
sce00030	Pentose phosphate pathway	27	0.116391	0.688441	0.000453171	0.0254866	0.0210103	0.326166	0.883728	0.846818	0.999548	0.846818	0.97902	0.846818
sce00040	Pentose and glucuronate interconversions	7	0.609798	0.955544	0.0569385	0.523803	0.106169	0.676024	0.390657	0.702675	0.943197	0.846818	0.894048	0.846818
sce00051	Fructose and mannose metabolism	17	0.0205513	0.326166	0.00190102	0.0680364	0.00327021	0.0919592	0.979486	0.846818	0.998104	0.846818	0.996737	0.846818
sce00052	Galactose metabolism	32	0.814082	0.955544	0.0213214	0.326166	0.367469	0.955544	0.186068	0.488098	0.978707	0.846818	0.632742	0.830074
sce00053	Ascorbate and aldarate metabolism	16	0.39567	0.955544	0.258662	0.925545	0.704776	0.955544	0.604633	0.819598	0.741592	0.846818	0.295496	0.629786
sce00061	Fatty acid biosynthesis	5	0.891589	0.955544	0.724702	0.955544	0.109719	0.685629	0.108672	0.368101	0.275765	0.616739	0.890543	0.846818
sce00071	Fatty acid metabolism	17	0.847198	0.955544	0.171519	0.776144	0.517196	0.955544	0.152982	0.456186	0.828675	0.846818	0.483109	0.76964
sce00072	Synthesis and degradation of ketone bodies	2	0.337701	0.926723	0.117905	0.688441	0.162994	0.776144	0.663106	0.830074	0.882531	0.846818	0.83755	0.846818
sce00100	Biosynthesis of steroids	11	0.337738	0.926723	0.235334	0.89084	0.352378	0.946696	0.662608	0.830074	0.764957	0.846818	0.647973	0.830074
sce00120	Bile acid biosynthesis	25	0.468159	0.955544	0.0445692	0.479438	0.59153	0.955544	0.532092	0.801407	0.95549	0.846818	0.408715	0.715031
sce00130	Ubiquinone biosynthesis	7	0.66824	0.955544	0.137919	0.743789	0.392021	0.955544	0.33219	0.658508	0.862341	0.846818	0.608434	0.819598
sce00190	Oxidative phosphorylation	56	1	0.955544	0.799147	0.955544	0.9752	0.955544	1.73134e-07	1.51011e-05	0.200973	0.510632	0.024825	0.149331
sce00193	ATP synthesis	27	0.975268	0.955544	0.503762	0.955544	0.267768	0.925545	0.0247669	0.149331	0.496481	0.774987	0.732432	0.84615
sce00220	Urea cycle and metabolism of amino groups	16	0.928456	0.955544	0.802647	0.955544	0.991661	0.955544	0.0716518	0.288299	0.197572	0.506843	0.00835692	0.0647919
sce00230	Purine metabolism	49	0.916744	0.955544	0.939322	0.955544	0.933995	0.955544	0.0833258	0.303023	0.0607326	0.268214	0.0660634	0.27439
sce00240	Pyrimidine metabolism	52	0.999204	0.955544	0.916538	0.955544	0.973244	0.955544	0.00079693	0.0120887	0.08353	0.303023	0.0267838	0.157425
sce00251	Glutamate metabolism	27	0.984631	0.955544	0.713283	0.955544	0.98722	0.955544	0.0153922	0.105502	0.286924	0.629588	0.0127996	0.0921021
sce00252	Alanine and aspartate metabolism	24	0.923932	0.955544	0.280883	0.925545	0.988922	0.955544	0.0761607	0.29812	0.719334	0.84615	0.0110964	0.0841613
sce00260	Glycine, serine and threonine metabolism	46	0.87864	0.955544	0.505346	0.955544	0.899169	0.955544	0.121455	0.388755	0.494842	0.774987	0.100914	0.355634
sce00271	Methionine metabolism	14	0.881225	0.955544	0.0885203	0.600846	0.702343	0.955544	0.118942	0.388755	0.911614	0.846818	0.297948	0.629786
sce00272	Cysteine metabolism	10	0.67464	0.955544	0.724605	0.955544	0.889036	0.955544	0.325717	0.649366	0.275726	0.616739	0.111151	0.37288
sce00280	Valine, leucine and isoleucine degradation	12	0.248501	0.909649	0.690428	0.955544	0.150039	0.767117	0.751786	0.846818	0.309892	0.635987	0.850172	0.846818
sce00290	Valine, leucine and isoleucine biosynthesis	16	0.336865	0.926723	0.94047	0.955544	0.937915	0.955544	0.663422	0.830074	0.0596227	0.266997	0.0621809	0.268994
sce00300	Lysine biosynthesis	15	0.223106	0.861112	0.0505066	0.497091	0.78999	0.955544	0.777136	0.846818	0.949578	0.846818	0.210244	0.510632
sce00310	Lysine degradation	32	0.427892	0.955544	0.287046	0.925545	0.617026	0.955544	0.572328	0.801407	0.713145	0.84615	0.383188	0.700707
sce00330	Arginine and proline metabolism	22	0.489674	0.955544	0.233976	0.89084	0.760631	0.955544	0.510594	0.788233	0.76623	0.846818	0.239578	0.55355
sce00340	Histidine metabolism	20	0.449125	0.955544	0.940392	0.955544	0.963432	0.955544	0.551154	0.801407	0.0596918	0.266997	0.036625	0.199657
sce00350	Tyrosine metabolism	20	0.721474	0.955544	0.457499	0.955544	0.917795	0.955544	0.278762	0.617971	0.54278	0.801407	0.0823119	0.303023
sce00360	Phenylalanine metabolism	10	0.278384	0.925545	0.49268	0.955544	0.541274	0.955544	0.721949	0.84615	0.507715	0.787272	0.459119	0.745031
sce00361	gamma-Hexachlorocyclohexane degradation	9	0.703867	0.955544	0.144065	0.759258	0.367268	0.955544	0.296494	0.629786	0.856172	0.846818	0.633126	0.830074
sce00362	Benzoate degradation via hydroxylation	2	0.198993	0.837475	0.174114	0.77893	0.188079	0.816799	0.801623	0.846818	0.826453	0.846818	0.812517	0.846818
sce00380	Tryptophan metabolism	17	0.5972	0.955544	0.292791	0.926723	0.91587	0.955544	0.403095	0.715031	0.707472	0.84615	0.0842481	0.303023
sce00400	Phenylalanine, tyrosine and tryptophan biosynthesis	22	0.106465	0.676024	0.314038	0.926723	0.808135	0.955544	0.893659	0.846818	0.6862	0.834173	0.192048	0.496323
sce00401	Novobiocin biosynthesis	3	0.341327	0.926723	0.315241	0.926723	0.738292	0.955544	0.659336	0.830074	0.6854	0.834173	0.262296	0.594235
sce00410	beta-Alanine metabolism	8	0.200674	0.837475	0.118913	0.688441	0.144645	0.759258	0.799636	0.846818	0.881307	0.846818	0.855607	0.846818
sce00430	Taurine and hypotaurine metabolism	2	0.0651952	0.523803	0.0994029	0.652223	0.0851655	0.595544	0.935085	0.846818	0.900983	0.846818	0.915178	0.846818
sce00440	Aminophosphonate metabolism	9	0.841989	0.955544	0.893645	0.955544	0.943128	0.955544	0.158263	0.463217	0.106547	0.367734	0.056991	0.265114
sce00450	Selenoamino acid metabolism	17	0.681261	0.955544	0.332482	0.926723	0.77946	0.955544	0.319012	0.6445	0.667796	0.830074	0.220766	0.527554
sce00460	Cyanoamino acid metabolism	8	0.460068	0.955544	0.16659	0.776144	0.418154	0.955544	0.540372	0.801407	0.833687	0.846818	0.582279	0.801407
sce00480	Glutathione metabolism	11	0.631691	0.955544	0.532612	0.955544	0.336011	0.926723	0.368666	0.694203	0.467765	0.752064	0.664334	0.830074
sce00500	Starch and sucrose metabolism	46	0.879962	0.955544	0.00353481	0.0927733	0.0583443	0.523803	0.120132	0.388755	0.99647	0.846818	0.941711	0.846818
sce00510	N-Glycan biosynthesis	33	0.696561	0.955544	0.0451098	0.479438	0.616607	0.955544	0.303632	0.634334	0.954943	0.846818	0.383604	0.700707
sce00512	O-Glycan biosynthesis	3	0.332102	0.926723	0.423071	0.955544	0.268211	0.925545	0.668553	0.830074	0.577636	0.801407	0.732383	0.84615
sce00513	High-mannose type N-glycan biosynthesis	15	0.190243	0.816799	0.613535	0.955544	0.830601	0.955544	0.809977	0.846818	0.386775	0.702675	0.169604	0.468798
sce00520	Nucleotide sugars metabolism	18	0.504884	0.955544	0.123618	0.705314	0.601731	0.955544	0.495412	0.774987	0.876533	0.846818	0.398555	0.713084
sce00521	Streptomycin biosynthesis	6	0.395918	0.955544	0.0287231	0.376928	0.0253755	0.356783	0.604575	0.819598	0.971361	0.846818	0.9747	0.846818
sce00530	Aminosugars metabolism	16	0.525859	0.955544	0.169418	0.776144	0.0762758	0.556085	0.474454	0.759319	0.830781	0.846818	0.923837	0.846818
sce00550	Peptidoglycan biosynthesis	1	0.907577	0.955544	0.872557	0.955544	0.94867	0.955544	0.0929416	0.33088	0.128096	0.399029	0.0516595	0.25007
sce00561	Glycerolipid metabolism	22	0.0703107	0.532312	0.00674445	0.156187	0.074858	0.556046	0.92978	0.846818	0.993268	0.846818	0.925237	0.846818
sce00562	Inositol phosphate metabolism	33	0.481186	0.955544	0.999137	0.955544	0.996664	0.955544	0.519034	0.795159	0.000864313	0.0125645	0.00334116	0.0388573
sce00563	Glycosylphosphatidylinositol(GPI)-anchor biosynthesi	21	0.979625	0.955544	0.245443	0.909649	0.992142	0.955544	0.0204089	0.129463	0.754773	0.846818	0.00787279	0.0647919
sce00564	Glycerophospholipid metabolism	38	0.947732	0.955544	0.872601	0.955544	0.863459	0.955544	0.0523236	0.25007	0.127507	0.399029	0.136654	0.414383
sce00590	Arachidonic acid metabolism	5	0.0681487	0.532312	0.0640159	0.523803	0.0215409	0.326166	0.932035	0.846818	0.936159	0.846818	0.978531	0.846818
sce00600	Glycosphingolipid metabolism	17	0.445523	0.955544	0.132688	0.740516	0.814746	0.955544	0.554778	0.801407	0.867476	0.846818	0.185458	0.488098
sce00602	Blood group glycolipid biosynthesis-neolactoseries	3	0.332102	0.926723	0.423071	0.955544	0.268211	0.925545	0.668553	0.830074	0.577636	0.801407	0.732383	0.84615
sce00603	Globoside metabolism	4	0.392463	0.955544	0.473503	0.955544	0.340134	0.926723	0.608138	0.819598	0.52712	0.799592	0.660438	0.830074
sce00604	Ganglioside biosynthesis	3	0.332102	0.926723	0.423071	0.955544	0.268211	0.925545	0.668553	0.830074	0.577636	0.801407	0.732383	0.84615
sce00620	Pyruvate metabolism	33	0.950988	0.955544	0.534188	0.955544	0.833502	0.955544	0.0490677	0.24456	0.466031	0.752064	0.166635	0.468798
sce00624	1- and 2-Methylnaphthalene degradation	11	0.944919	0.955544	0.788942	0.955544	0.72046	0.955544	0.0551859	0.260186	0.211332	0.510632	0.279858	0.617971
sce00625	Tetrachloroethene degradation	13	0.588399	0.955544	0.325447	0.926723	0.838905	0.955544	0.41194	0.715031	0.674866	0.831991	0.161308	0.463217
sce00627	1,4-Dichlorobenzene degradation	1	0.383927	0.955544	0.135431	0.740516	0.214227	0.857045	0.617265	0.825123	0.865247	0.846818	0.786683	0.846818
sce00630	Glyoxylate and dicarboxylate metabolism	15	0.998222	0.955544	0.59509	0.955544	0.972978	0.955544	0.00178261	0.0238745	0.405225	0.715031	0.027073	0.157425
sce00632	Benzoate degradation via CoA ligation	29	0.77283	0.955544	0.999696	0.955544	0.991796	0.955544	0.227347	0.532342	0.00030419	0.00505374	0.00821741	0.0647919
sce00640	Propanoate metabolism	11	0.862432	0.955544	0.665713	0.955544	0.624176	0.955544	0.137776	0.414383	0.334632	0.659601	0.376183	0.700649
sce00650	Butanoate metabolism	33	0.575164	0.955544	0.280519	0.925545	0.547326	0.955544	0.425052	0.726941	0.719667	0.84615	0.452892	0.742709
sce00670	One carbon pool by folate	15	0.248583	0.909649	0.502752	0.955544	0.0692117	0.532312	0.751674	0.846818	0.497571	0.774987	0.930896	0.846818
sce00680	Methane metabolism	8	0.82383	0.955544	0.0265011	0.359761	0.692314	0.955544	0.176457	0.473568	0.973567	0.846818	0.308075	0.635987
sce00710	Carbon fixation	17	0.84375	0.955544	0.154792	0.771382	0.700616	0.955544	0.156433	0.462523	0.84539	0.846818	0.29965	0.629786
sce00720	Reductive carboxylate cycle (CO2 fixation)	11	0.992646	0.955544	0.789215	0.955544	0.922551	0.955544	0.00737332	0.0643117	0.211058	0.510632	0.0775861	0.29812
sce00730	Thiamine metabolism	2	0.435489	0.955544	0.554049	0.955544	0.416432	0.955544	0.565381	0.801407	0.446824	0.742709	0.58443	0.801407
sce00740	Riboflavin metabolism	11	0.631691	0.955544	0.630263	0.955544	0.582625	0.955544	0.368666	0.694203	0.370094	0.694203	0.417745	0.721517
sce00750	Vitamin B6 metabolism	4	0.379898	0.955544	0.691899	0.955544	0.679131	0.955544	0.620697	0.826544	0.308651	0.635987	0.321429	0.6445
sce00760	Nicotinate and nicotinamide metabolism	29	0.331762	0.926723	0.983895	0.955544	0.922327	0.955544	0.668452	0.830074	0.0161292	0.108217	0.077758	0.29812
sce00770	Pantothenate and CoA biosynthesis	10	0.249545	0.909649	0.830115	0.955544	0.572986	0.955544	0.750769	0.846818	0.170136	0.468798	0.427403	0.727396
sce00780	Biotin metabolism	7	0.284334	0.925545	0.45781	0.955544	0.791805	0.955544	0.716067	0.84615	0.54266	0.801407	0.208535	0.510632
sce00790	Folate biosynthesis	18	0.862538	0.955544	0.98201	0.955544	0.894184	0.955544	0.137625	0.414383	0.018023	0.116445	0.105952	0.367734
sce00860	Porphyrin and chlorophyll metabolism	12	0.984613	0.955544	0.554958	0.955544	0.958787	0.955544	0.0154221	0.105502	0.4454	0.742709	0.0412934	0.216346
sce00900	Terpenoid biosynthesis	5	0.215584	0.857045	0.438001	0.955544	0.276701	0.925545	0.784825	0.846818	0.562551	0.801407	0.723767	0.84615
sce00903	Limonene and pinene degradation	9	0.385115	0.955544	0.793237	0.955544	0.262088	0.925545	0.615285	0.825123	0.207062	0.510632	0.738252	0.846818
sce00910	Nitrogen metabolism	13	0.756917	0.955544	0.43376	0.955544	0.865032	0.955544	0.243356	0.55858	0.566583	0.801407	0.135158	0.414383
sce00920	Sulfur metabolism	6	0.421731	0.955544	0.15373	0.771382	0.633784	0.955544	0.578769	0.801407	0.846572	0.846818	0.366697	0.694203
sce00930	Caprolactam degradation	3	0.218557	0.857045	0.168228	0.776144	0.16687	0.776144	0.781975	0.846818	0.832226	0.846818	0.833581	0.846818
sce00960	Alkaloid biosynthesis II	8	0.927803	0.955544	0.971175	0.955544	0.6199	0.955544	0.0723491	0.288299	0.0288985	0.160037	0.380521	0.700707
sce00970	Aminoacyl-tRNA synthetases	37	0.996179	0.955544	0.999859	0.955544	0.999909	0.955544	0.0038265	0.0396345	0.000141012	0.00273319	9.09184e-05	0.00201102
sce00980	Metabolism of xenobiotics by cytochrome P450	8	0.589186	0.955544	0.0370134	0.470052	0.425089	0.955544	0.411245	0.715031	0.963076	0.846818	0.575346	0.801407
sce01030	Glycan structures - biosynthesis 1	34	0.276201	0.925545	0.0592449	0.523803	0.441092	0.955544	0.723981	0.84615	0.940819	0.846818	0.559123	0.801407
sce01031	Glycan structures - biosynthesis 2	6	0.218365	0.857045	0.839822	0.955544	0.219876	0.857045	0.782011	0.846818	0.16049	0.463217	0.780502	0.846818
sce01032	Glycan structures - degradation	1	0.0503503	0.497091	0.116085	0.688441	0.0639083	0.523803	0.949973	0.846818	0.884524	0.846818	0.936482	0.846818
sce02010	ABC transporters	2	0.593026	0.955544	0.70702	0.955544	0.647645	0.955544	0.407831	0.715031	0.29374	0.629786	0.353176	0.684551
sce02021	Two-component system - Organism-specific	3	0.434408	0.955544	0.829494	0.955544	0.88128	0.955544	0.566302	0.801407	0.170964	0.468798	0.119079	0.388755
sce03010	Ribosome	160	0	0	0	0	0	0	1	0.846818	1	0.846818	1	0.846818
sce03020	RNA polymerase	29	0.99445	0.955544	0.98841	0.955544	0.993314	0.955544	0.00555941	0.0554176	0.011608	0.0861683	0.00669658	0.0599067
sce03022	Basal transcription factors	23	0.999968	0.955544	1	0.955544	0.999984	0.955544	3.24358e-05	0.00125739	2.06956e-09	3.61023e-07	1.63201e-05	0.000948984
sce03030	DNA polymerase	9	0.982314	0.955544	0.999943	0.955544	0.996669	0.955544	0.0177312	0.116445	5.75039e-05	0.00167187	0.00334123	0.0388573
sce03050	Proteasome	11	0.996348	0.955544	0.999908	0.955544	0.993503	0.955544	0.0036626	0.0396345	9.2225e-05	0.00201102	0.0065139	0.059806
sce03060	Protein export	10	0.935739	0.955544	0.952806	0.955544	0.931522	0.955544	0.0643859	0.273945	0.0472915	0.239123	0.0686087	0.28161
sce04010	MAPK signaling pathway	55	0.460869	0.955544	0.999454	0.955544	0.958163	0.955544	0.539302	0.801407	0.000546562	0.0086677	0.0418758	0.216346
sce04070	Phosphatidylinositol signaling system	35	0.478295	0.955544	0.997133	0.955544	0.993928	0.955544	0.521918	0.795159	0.00287138	0.0357783	0.00608141	0.0589371
sce04110	Cell cycle	105	0.993624	0.955544	1	0.955544	0.999959	0.955544	0.00638175	0.059806	2.69701e-12	9.40957e-10	4.15088e-05	0.0014482
sce04120	Ubiquitin mediated proteolysis	30	0.561656	0.955544	0.996144	0.955544	0.94808	0.955544	0.438572	0.742709	0.00386247	0.0396345	0.0519811	0.25007
sce04130	SNARE interactions in vesicular transport	23	0.93763	0.955544	0.999969	0.955544	0.879142	0.955544	0.0624511	0.268994	3.15469e-05	0.00125739	0.120991	0.388755
